# Supplementary material for: A Localized Scaffold for cGMP Increase Is Required for Apical Dendrite Development
Source: PubMed Central journal article supplement — Cell Rep. Author manuscript; Available in PMC 2020 Jun 14. (PMC7293895; doi:10.1016/j.celrep.2020.03.083), 2020-04-14
Supplement: NIHMS1586923-supplement-Szczurkowska_Lee_Supplementary_Figures.pdf [file NIHMS1586923-supplement-Szczurkowska_Lee_Supplementary_Figures.pdf]

*Supplementary Figure Legends*

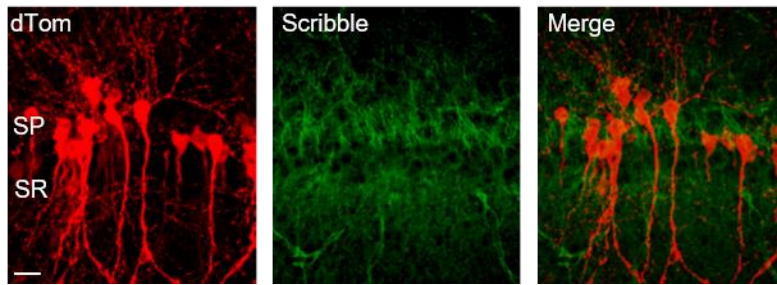

***Figure S1. Scribble expression in CA1 pyramidal neurons***

Images of Scribble immunofluorescence (green) in representative CA1 pyramidal neurons, at P7, following *in utero* labeling with dTomato marker. SP, stratum pyramidale; SR, stratum radiatum. Scale bar represents 20  $\mu\text{m}$ . Related to Figure 1 - Separate channels for the images shown in Figure 1C.

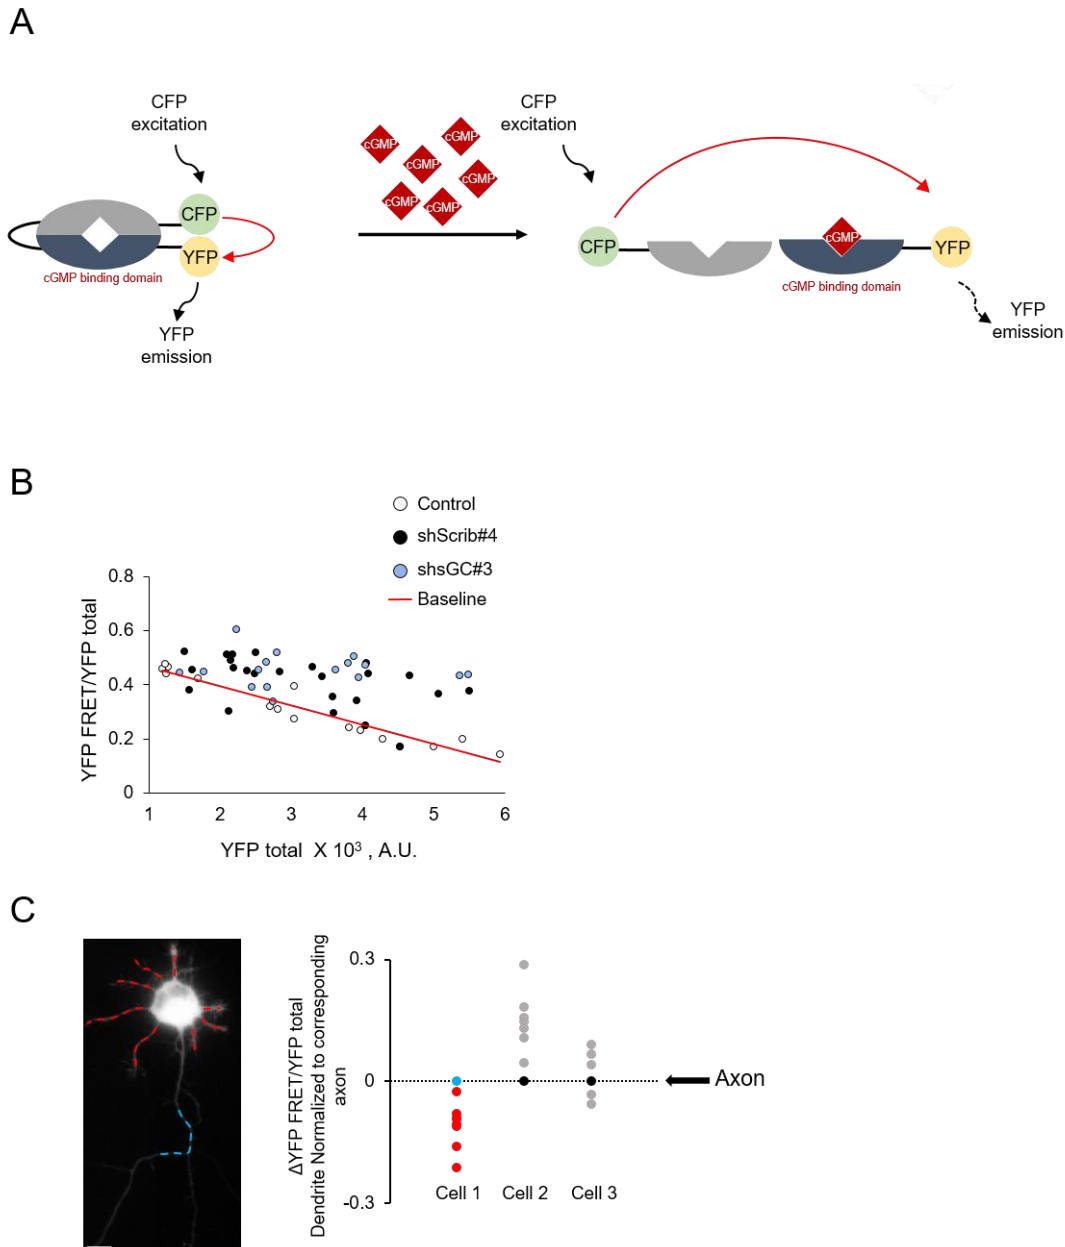

**Figure S2. cGMP - FRET measurements in cultured hippocampal neurons**

**(A)** Schematic depiction of the FRET cGMP reporter cGi-500 (Russwurm et al., 2007). The FRET signal was determined by the YFP fluorescence, measured upon CFP excitation (YFP-FRET). Upon cGMP increase and cGMP binding, the cGi-500 sensor relaxes its conformation, resulting in YFP-FRET reduction, whereas cGMP decrease is reflected in YFP-FRET increase.

**(B)** Measurement of baseline cGMP-levels in cultured hippocampal neurons using FRET cGMP sensor, and effects on cGMP upon Scribble or sGC- $\beta$ 1 knock-down. Neurons co-transfected with FRET cGMP reporter cGi-500 together with control-, Scribble-, or sGC- $\beta$ 1-shRNAs, and somatic FRET measurements performed at 36 - 48 hr after. FRET signal was determined by YFP fluorescence measured upon CFP excitation (YFP-FRET). Because the FRET signal (YFP-FRET) in each cell would depend on the level of probe expression in that cell, FRET values (YFP-FRET), were normalized to total YFP levels determined upon YFP excitation (YFP-total, reflecting the level of probe expression). Baseline cGMP for control-transfected cells was determined by FRET signal in each cell normalized to probe expression level in that cell (YFP-FRET / YFP-total), presented for all cells with varying probe concentration (YFP-total; arbitrary fluorescence units, A.U.) (open circles). A range in which somatic FRET (YFP-FRET / YFP-total) demonstrated linear correlation with levels of probe expression (YFP-total), represents baseline

cGMP-levels in control cells (open circles, linear fit). Normalized FRET signals (YFP-FRET / YFP-total) were determined for ShsGC#3 (blue symbols) or ShScrib#4 (black symbols) transfected cells, which expressed cGi-500 at a level for which control cells showed a linear response. Somatic FRET signals (YFP-FRET / YFP-total) for sGC- $\beta$ 1- or Scribble-shRNA cells were scattered above those for control-shRNA, indicating cGMP decrease compared to control.

(C) Schematic depiction of FRET cGMP measurements in dendrites (as performed in Figure 2I-2J and 7E-7F). Normalized FRET signals (YFP-FRET / YFP-total) were determined for all dendrites in each cell (measurements averaged over the entire dendritic length) and the axon (measurement averaged over a  $\sim 50\mu\text{m}$  axonal segment, at least  $30\mu\text{m}$  away from the soma). Data was presented for each cell (cell #1, #2, and so on), as the difference in normalized FRET signals ( $\Delta\text{YFP-FRET} / \text{YFP-total}$ ) between dendrites of an individual neuron relative to the axon of that neuron.

Related to Figure 2.

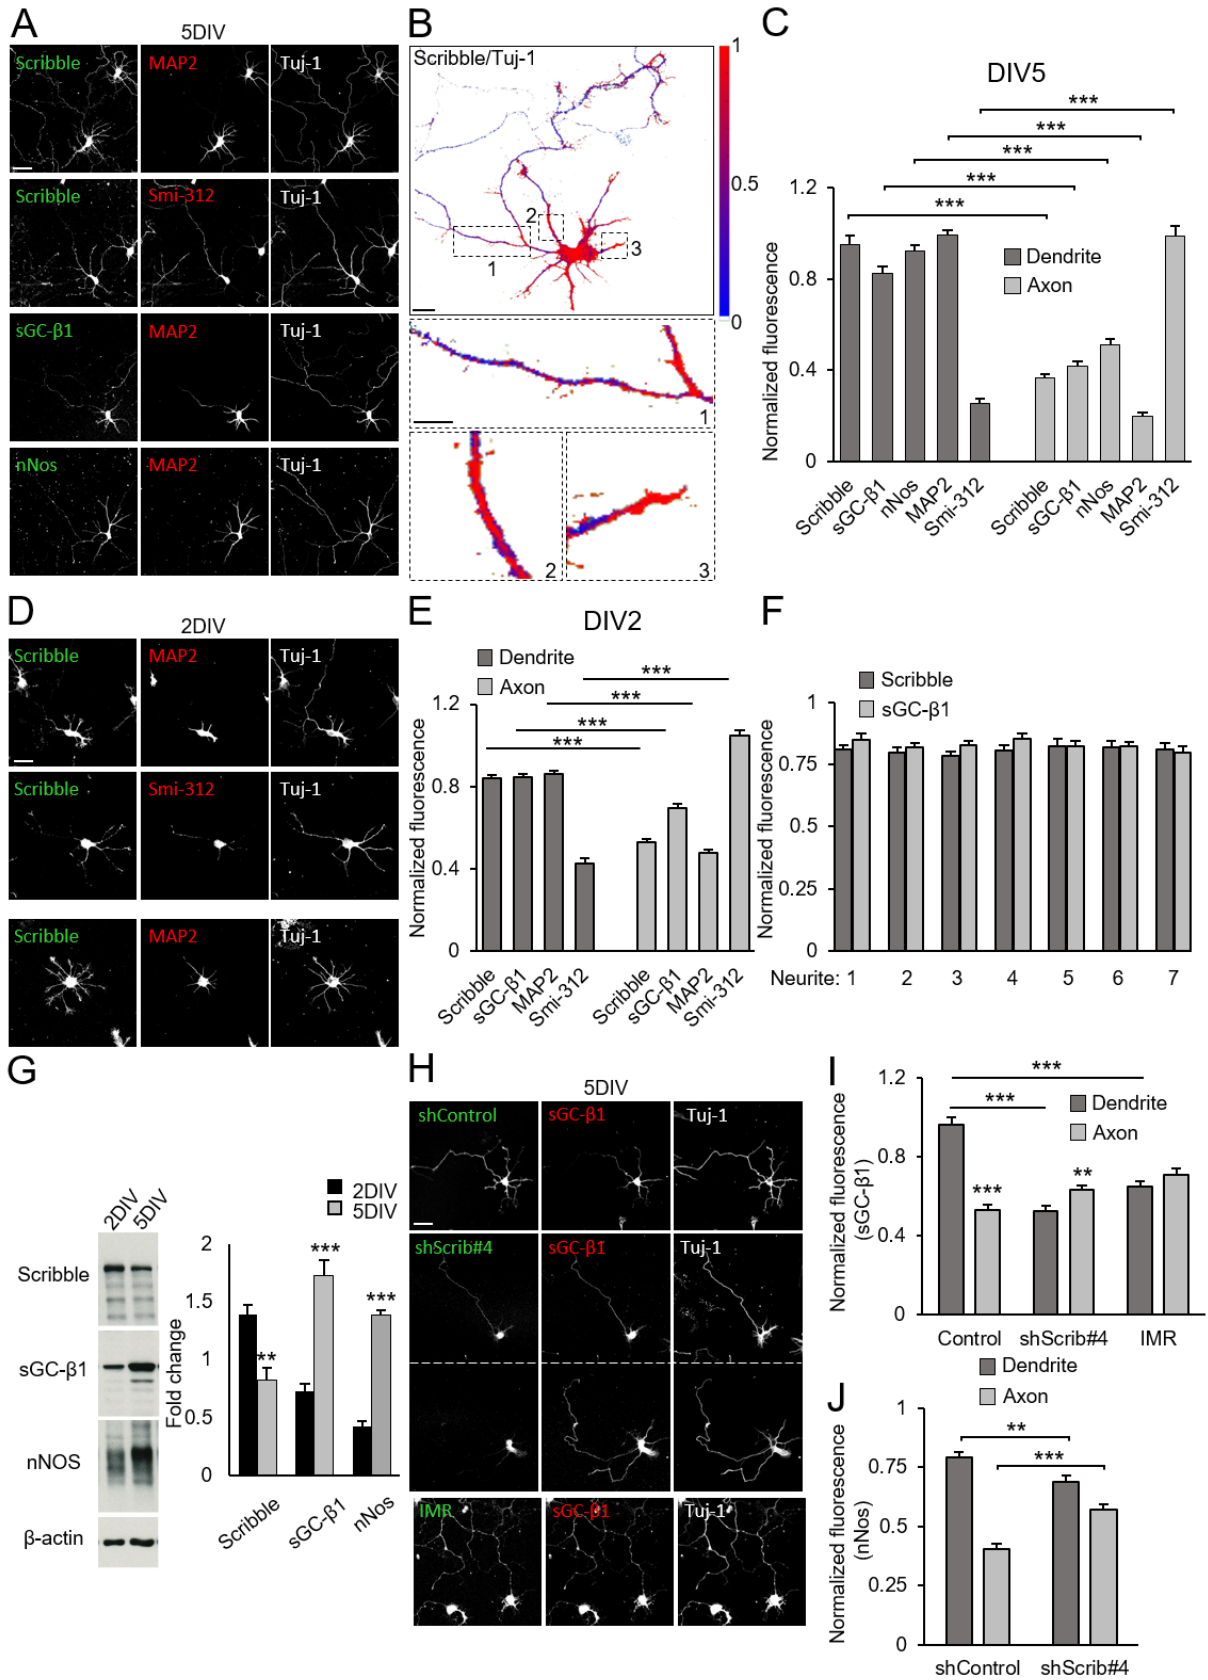

**Figure S3. Enrichment of sGC and Scribble expression in dendrites**

**(A, D, H)** Images of representative hippocampal neurons at 5DIV (A, H) or 2DIV (D), immunostained for Scribble, sGC- $\beta$ 1, or nNOS, together with dendrite or axon markers, MAP2 or smi-312, and neuron-specific marker Tuj-1. (H) Neurons were immunostained following transfection with ShScrib#4 or control shRNA, or IMR domain. (D) Shown 2DIV polarized or non-polarized neurons. Scale bar represents 40  $\mu$ m. Distinctly higher levels of Scribble and sGC were found in soma and dendrites of polarized neurons (A, D). sGC enrichment in dendrites was impaired following Scribble knock-down or IMR expression (H).

**(B)** Image of normalized Scribble fluorescence (Scribble / Tuj-1) in dendrites vs the axon, in a representative polarized hippocampal neuron, immunostained at 5DIV for Scribble and Tuj-1 (together with MAP2; same cell as in top panel in A). Scribble fluorescence normalized to that of Tuj-1, coded in pseudo-colors. Distinctly higher normalized Scribble fluorescence were found in dendrites. Scale bar represents 50  $\mu$ m. Bottom, higher magnification images (of boxed regions in the top panel) of normalized Scribble fluorescence in proximal axon (1) or representative dendrites (2 and 3). Scale bar represents 20  $\mu$ m.

**(C, E)** Quantification of immunofluorescence for Scribble, sGC- $\beta$ 1 or nNOS, or smi-312 or MAP2, in dendrites vs the axon, in all polarized neurons at 5DIV (C) or 2DIV (E), immunostained for Scribble, sGC- $\beta$ 1 or nNOS, and Tuj-1, together with MAP2 or smi-312. Average fluorescence intensity for Scribble, sGC- $\beta$ 1, nNOS, smi-312 or MAP2, in each dendrite or the axon, for all neurons (n = 50-75 cells, 3 cultures), was normalized to that of Tuj-1. Distinctly higher levels of Scribble, sGC- $\beta$ 1 and nNOS were found in dendrites (with high MAP2) than in axons (with high smi-312) at both 2DIV and 5DIV polarized neurons (5DIV; Dendrite: Scribble,  $0.95 \pm 0.03$ ; sGC- $\beta$ 1,  $0.82 \pm 0.02$ ; nNOS,  $0.92 \pm 0.02$ ; MAP2,  $0.99 \pm 0.02$ ; Smi-312:  $0.25 \pm 0.02$ ; Axon: Scribble,  $0.36 \pm 0.01$ ; sGC- $\beta$ 1,  $0.41 \pm 0.02$ ; nNOS,  $0.51 \pm 0.02$ ; MAP2,  $0.19 \pm 0.01$ ; Smi-312,  $0.98 \pm 0.04$ ; 2DIV; Dendrite: Scribble,  $0.84 \pm 0.01$ ; sGC- $\beta$ 1,  $0.84 \pm 0.02$ ; MAP2,  $0.86 \pm 0.01$ ; Smi-312:  $0.42 \pm 0.02$ ; Axon: Scribble,  $0.52 \pm 0.01$ ; sGC- $\beta$ 1,  $0.69 \pm 0.01$ ; MAP2,  $0.47 \pm 0.01$ ; Smi-312,  $0.94 \pm 0.01$ ; Student's t-test, \*\*\* $p \leq 0.001$ ).

**(F)** Quantification of Scribble or sGC- $\beta$ 1 immunofluorescence in undifferentiated neurites of un-polarized neurons at 2DIV, immunostained for Scribble or sGC- $\beta$ 1, together with Tuj-1 and MAP2. Average fluorescence intensity for Scribble or sGC- $\beta$ 1 for each neurite, normalized to that of Tuj-1, was plotted in the order of neurite length for the first seven neurites in each cell, averaged over all cells. No significant differences of Scribble or sGC- $\beta$ 1 fluorescence were found among the neurites (n = 50-60 cells, 3 cultures; One-way ANOVA, Tukey's Multiple Comparison Test).

**(G)** Immunoblots of total lysates of 2DIV or 5DIV cultured hippocampal neurons with Abs to Scribble, nNOS, or sGC- $\beta$ 1. Expression at 2DIV vs 5DIV was quantified following normalization to  $\beta$ -actin ( $\pm$ SEM, n=4, Student's t-test, \*\* $p \leq 0.01$ ; \*\*\* $p \leq 0.001$ ). Scribble expression was higher at 2DIV than at 5DIV.

**(I, J)** Quantification of sGC- $\beta$ 1 or nNOS immunofluorescence in dendrites vs the axon, following Scribble knock-down or IMR over-expression. Average sGC- $\beta$ 1 (I) or nNOS (J) fluorescence intensity in each dendrite vs the axon, normalized to that of Tuj-1, for all polarized neurons at 5DIV, expressing ShScrib#4 or control-shRNA, or IMR (n = 75 cells, 3 cultures). Distinct sGC or nNOS expression in dendrites (see C, and control) was abolished upon Scribble knock-down or IMR expression (sGC- $\beta$ 1, Dendrite: Control,  $0.95 \pm 0.04$ ; shScrib#4,  $0.52 \pm 0.02$ ; IMR,  $0.65 \pm 0.02$ ; Axon: Control,  $0.53 \pm 0.03$ ; shScrib#4,  $0.63 \pm 0.02$ ; IMR,  $0.7 \pm 0.03$ ; nNOS, Dendrite: shControl,  $0.79 \pm 0.02$ ; shScrib#4,  $0.68 \pm 0.02$ ; Axon: shControl,  $0.4 \pm 0.02$ ; shScrib#4,  $0.57 \pm 0.02$ ; Student's t-test and One-way ANOVA, Tukey's Multiple Comparison Test, \*\* $p \leq 0.01$ ; \*\*\* $p \leq 0.001$ ).

Related to Figure 1C and 1D, Figure 2, and Figure 5.

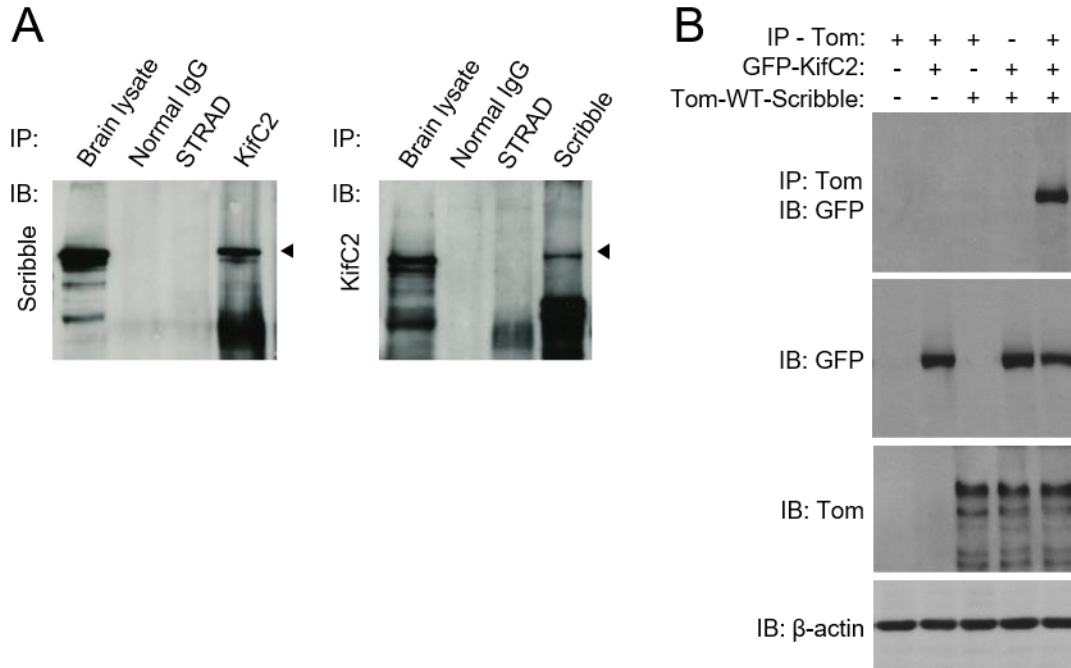

**Figure S4. Kinesin KifC2 associates with Scribble**

(A) Co-IP of Scribble with KifC2 from the embryonic brain. IP from E18 rat brain lysates with KifC2 or Scribble, and IB with KifC2 or Scribble, to test for reciprocal co-IP with both Abs. “Brain lysate”, total brain lysate. Co-IP with normal IgG or with the control protein STRAD, served control (n = 3).

(B) Co-IP of KifC2 with Scribble from HEK-293 cell lysates co-expressing EGFP-KifC2 with dTom-Scribble. IP, with Tom. IB, with GFP. Total cell lysates were subjected to IB with Tom or GFP, to check expression. Co-IP with normal IgG served control.  $\beta$ -actin served control for loading. Scribble co-precipitated KifC2 (n = 3).

Related to Figure 7.

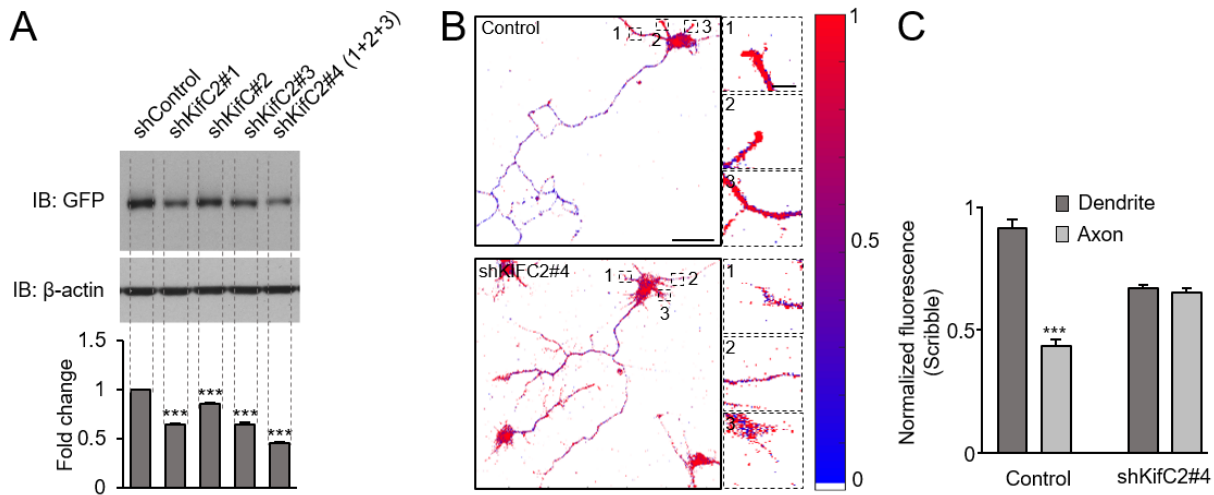

**Figure S5. Scribble - KifC2 association is necessary for the dendritic localization of Scribble**

(A) Knock-down of KifC2 in HEK-293 cells with shRNAs. Three shRNAs targeting KifC2 (ShKifC2#1, #2 and #3; or ShKifC2#4, a combined pool of ShKifC2#1 + #2 + #3) (cloned into pRNAT-U6.3 vector that also drives either EGFP or dTom expression), co-transfected in HEK-293 cells together with targeted EGFP-KifC2. Whole-cell extracts immunoblotted for GFP. “Control”, control shRNA. KifC2 levels were quantified as fold reduction ( $\pm$  SEM,  $n=5$ ; One-way ANOVA; Dunnett's Multiple Comparison Test,  $***p \leq 0.001$ ) relative to control shRNA, normalized to  $\beta$ -actin. Combination of KifC2 shRNAs (ShKifC2#4), most efficiently knocked-down EGFP-KifC2 expression.

(B) Localization of Scribble in axon vs dendrites following KifC2 knock-down. Images of normalized Scribble fluorescence (Scribble / Tuj-1) in dendrites vs the axon, in representative polarized cultured neurons, transfected with ShKifC2#4 or control shRNA, immunostained at 5DIV for Scribble and Tuj-1. Scribble fluorescence normalized to Tuj-1, coded in pseudo-colors. Higher normalized Scribble signal found in dendrites of control-shRNA-transfected cell but not in ShKifC2#4-transfected cell. Scale bar represents 30  $\mu$ m. Right, higher magnification images (of boxed regions on left) of normalized Scribble fluorescence in three representative dendrites (1, 2, 3). Scale bar represents 5  $\mu$ m.

(C) Quantification of Scribble immunofluorescence in dendrites vs the axon following KifC2 knock-down. Average Scribble immunofluorescence intensity in each dendrite vs the axon normalized to Tuj-1 fluorescence, for all polarized neurons at 5DIV, transfected with ShKifC2#4 or control-shRNA ( $n = 75$  cells, 3 cultures). Distinct Scribble localization in dendrites was abolished following KifC2 knock-down (Control: Dendrite,  $0.91 \pm 0.03$ ; Axon,  $0.43 \pm 0.02$ ; ShKifC2#4: Dendrite,  $0.67 \pm 0.01$ ; Axon,  $0.65 \pm 0.01$ ; Student's t-test,  $***p \leq 0.001$ ).

Related to Figure 7. Also related to Figure 1C and 1D and Figure 2.

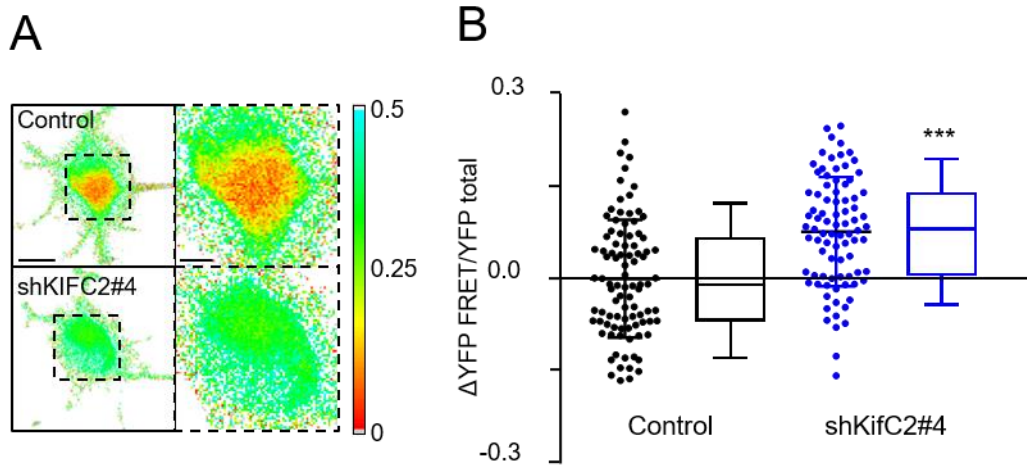

**Figure S6. Somatic cGMP levels decrease upon KifC2 knock-down**

(A) Representative images of normalized somatic cGMP FRET signals for control- or KifC2-shRNA (ShKifC2#4) transfected cells. Normalized somatic FRET (YFP-FRET / YFP-total) coded in pseudo-colors, for control or ShKifC2#4 cells co-expressing cGi-500. Scale bar represents 10  $\mu$ m. Right, higher magnification images (of boxed regions on left). Scale bare represents 5  $\mu$ m. Somatic FRET increase upon KifC2 knock-down reflects cGMP decrease.

(B) Summary of the difference in normalized somatic FRET ( $\Delta$ YFP-FRET / YFP-total) compared to average of control for all control or ShKifC2#4 transfected cells. Cells expressing ShKifC2#4 exhibited higher FRET than average of control, reflecting somatic cGMP decrease (mean  $\pm$  SEM; 3 cultures, 20-40 cells each; Control,  $0.0 \pm 0.010$ ; ShKifC2#4,  $0.077 \pm 0.010$ ; Student's t-test, \*\*\* $p \leq 0.001$ ).

Related to Figure 2 and Figure 7.
